# Supplementary material for: Clinical Characteristics and Prognostic Impact of Short Physical Performance Battery in Hospitalized Patients with Acute Heart Failure—Results of the PROFUND-IC Registry
Source: MDPI journal article supplement (doi:10.3390/jcm12185974), 2023-09-14
Supplement: s1 [file s1]

**Table S1.** Frailty assessment through Short Physical Performance Battery (SPPB).

| POSITION                                                  | TIME                    | [n (%)]     |
|-----------------------------------------------------------|-------------------------|-------------|
| Feet together                                             | Less than 10s           | 199 (44.2)  |
|                                                           | 10s or more             | 251 (55.80) |
| Semi tandem feet                                          | Less than 10s           | 277 (57.5)  |
|                                                           | 10s or more             | 163 (37.0)  |
| Tandem Feet                                               | Less than 3s            | 291 (66.3)  |
|                                                           | 3-9.9 s                 | 90 (20.5)   |
|                                                           | 10s                     | 58 (13.3)   |
| Walk 4 meters                                             | Cannot perform          | 142 (31.6)  |
|                                                           | More than 8.7 sec       | 135 (30.1)  |
|                                                           | 6.2-8.7 sec             | 78 (17.4)   |
|                                                           | 4.8-6.2 sec             | 54 (12.0)   |
|                                                           | Less than 4.8 sec       | 40 (8.9)    |
| Rising from a chair with arms crossed                     | Cannot perform          | 307 (68.4)  |
|                                                           | Can perform             | 142 (31.6)  |
| Rising from a chair with arm crossed over (5 repetitions) | More than 60s or unable | 31 (21.8)   |
|                                                           | More than 16.7 s        | 46 (32.4)   |
|                                                           | 13.7-16.6 s             | 23 (16.2)   |
|                                                           | 11.2-13.6 s             | 30 (21.1)   |
|                                                           | 11.1 s or less          | 12 (8.5)    |
| SPPB categorization                                       |                         | [n (%)]     |
| >5 points                                                 |                         | 100 (22.3)  |
| ≤5 points                                                 |                         | 349 (77.7)  |

**Legend:** SPPB; Short Physical Performance Battery.

**Table S2.** Description of the sample according to categorized SPPB score.

| SPPB           | [n (%)]    |
|----------------|------------|
| Very low (0-3) | 272 (60.6) |
| Low (4-6)      | 100 (22.1) |
| Medium (7-9)   | 50 (11.1)  |
| High (10-12)   | 27 (6.0)   |

**Legend:** SPPB; Short Physical Performance Battery.

**Table S3.** Binary logistic regression

| Readmissions at 30 days  |                 |         |
|--------------------------|-----------------|---------|
| VARIABLE                 | Exp (B)         | P-value |
| SPPB≤5                   | 1,42(1,27-1,56) | 0,313   |
| Readmissions at 6 months |                 |         |
| VARIABLE                 | Exp (B)         | P-value |
| SPPB≤5                   | 0,49(0,45-0,53) | 0,073   |
| Readmissions at 1 year   |                 |         |

| VARIABLE | Exp (B)          | P-value |
|----------|------------------|---------|
| SPPB≤5   | 0,71 (0,63-0,78) | 0,503   |
